# Supplementary material for: Twist Angle-Dependent Interlayer Exciton in MoS2 Bilayers Revealed by Room-Temperature Reflectance
Source: MDPI journal article supplement (doi:10.3390/cryst12060761), 2022-05-25
Supplement: s1 [file s1]

Archive with 1 entries (1 files):
- crystals-1718868-supplementary.pdf
